# Supplementary material
Source: MDPI journal article supplement (https://www.mdpi.com/2221-3759/4/4/33)
Supplement: s1 [file s1]

# **Supplementary Materials: Yeast Gup1(2) Proteins Are Homologues of the Hedgehog Morphogens Acyltransferases HHAT(L): Facts and Implications**

Cândida Lucas, Célia Ferreira, Giulia Cazzanelli, Ricardo Franco-Duarte and Joana Tulha

## **Legend**

**Figure S1.** Cladogram of the Gup1/HHATL (A) and Gup2/HHAT (B) using the sequences in Files S1 and S2.
