# Supplementary material
Source: MDPI journal article supplement (https://www.mdpi.com/2221-3759/4/4/33)

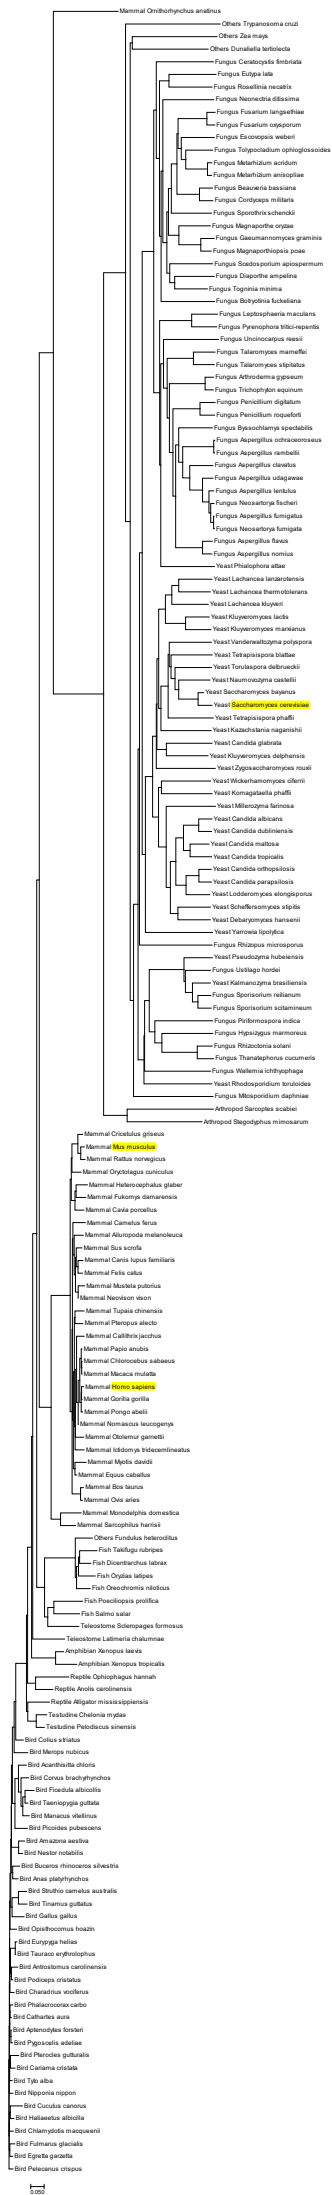

Supplement: s1 [file s1]

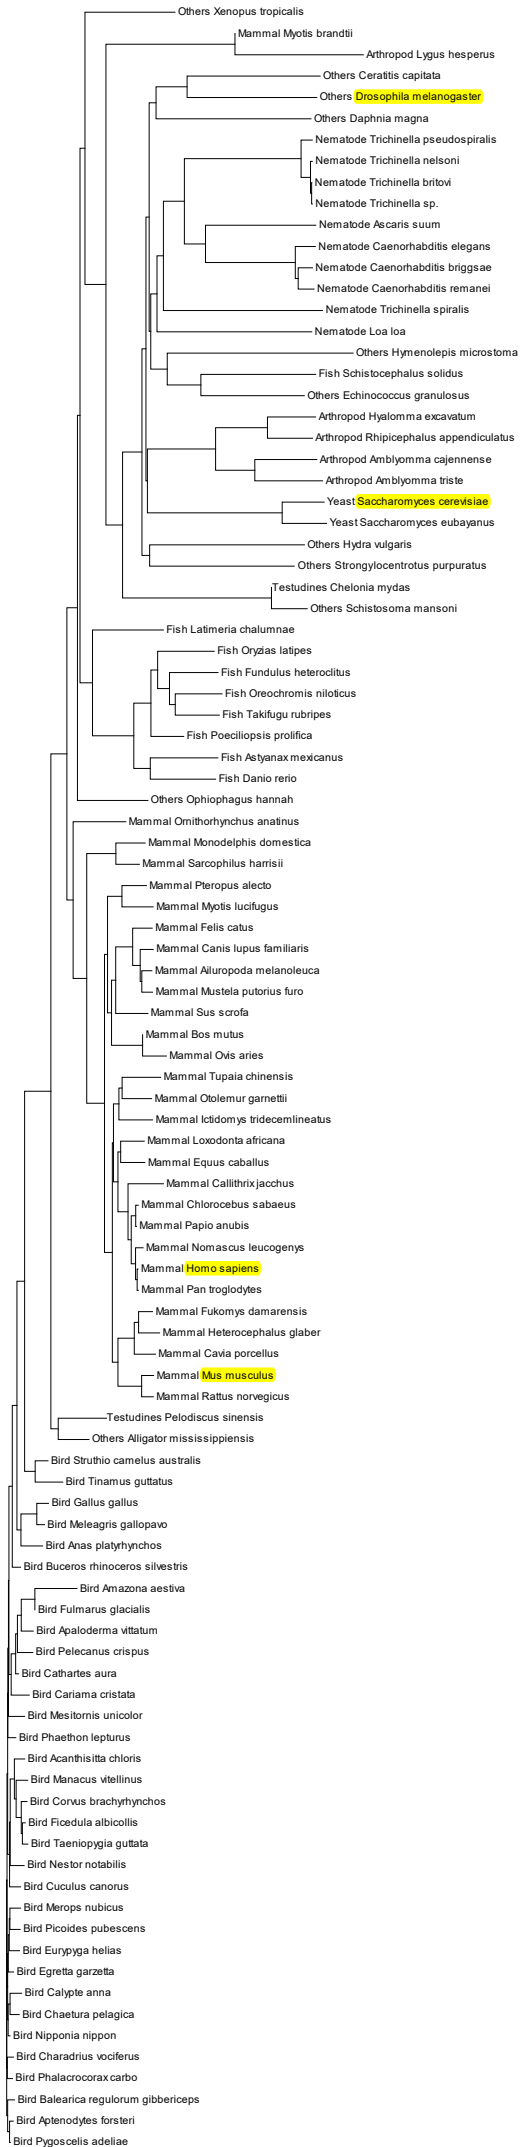

0.050

Supplement: s1 [file s1]
